# Supplementary material for: Sesame ball-like PTT nanoplatforms with fluorescence-background-free temperature sensing
Source: Royal Society of Chemistry journal article supplement (doi:10.1039/d4tc01559b), 2024-01-01
Supplement: d4tc01559b1.pdf [file d4tc01559b1.pdf]

## Supporting Information

### Sesame-ball-like PTT nanoplatforms with autofluorescence-free imaging and temperature sensing

Biying Bao, Jia Song, Jian Yang, Shuai Wang, Hancheng Zhu, Duanting Yan, Chunguang Liu, Changshan Xu and Yuxue Liu\*

School of Physics, Northeast Normal University, 5268 Ren min Street, Changchun, 130024, China.

\*E-mail: [yxliu@nenu.edu.cn](mailto:yxliu@nenu.edu.cn)

### Experimental Section

#### 1.1 Calculation of the bandgap of Ag<sub>2</sub>S nanoparticles

The absorption spectrum of Ag<sup>+</sup>-poor Ag<sub>2</sub>S nanoparticles (as shown in Fig.2a) was taken as a function according to the Tauc method <sup>1</sup>:

$$\alpha hv = A(hv - E_g)^n \quad (S1)$$

Where,  $\alpha$  is the absorption coefficient,  $h$  is Planck's constant ( $h \approx 4.13567 \times 10^{-15}$  eV·s),  $\nu$  is the frequency,  $h\nu$  represents the photon energy,  $h\nu = 1240/c$ ,  $c$  is the speed of light ( $c \approx 3 \times 10^8$  m/s),  $A$  is the proportionality constant,  $E_g$  is the band gap width and  $n$  is a constant. According to the reported research,  $n=1/2$  and  $n=2$  were used in the equations corresponding to a direct bandgap semiconductor and an indirect bandgap semiconductor. <sup>2</sup>Ag<sub>2</sub>S is a direct bandgap semiconductor and the  $n=1/2$  was used <sup>3-5</sup>:

$$(\alpha hv)^2 = A(hv - E_g) \quad (S2)$$

The relationship curve between y axis  $(\alpha hv)^2$  and x axis (eV) (tauc diagram) is shown in Fig.2a. The bandgap energy ( $E_g$ ) of Ag<sup>+</sup>-poor Ag<sub>2-x</sub>S nanoparticles was determined from the value of the intersection of the tangent line and x axis (eV) of the light absorption region. It is found that the  $E_g$  value of Ag<sup>+</sup>-poor Ag<sub>2</sub>S nanoparticles is the same as the reported value ( $\sim 1.1$  eV)<sup>6,7</sup>.

## Figures

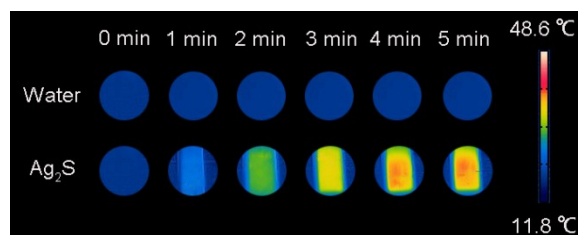

Figure S1 The time-dependent temperature change of the aqueous solution with  $\text{Ag}^+$ -poor  $\text{Ag}_2\text{S}$  nanoparticles and water after 5-min 635 nm laser irradiation

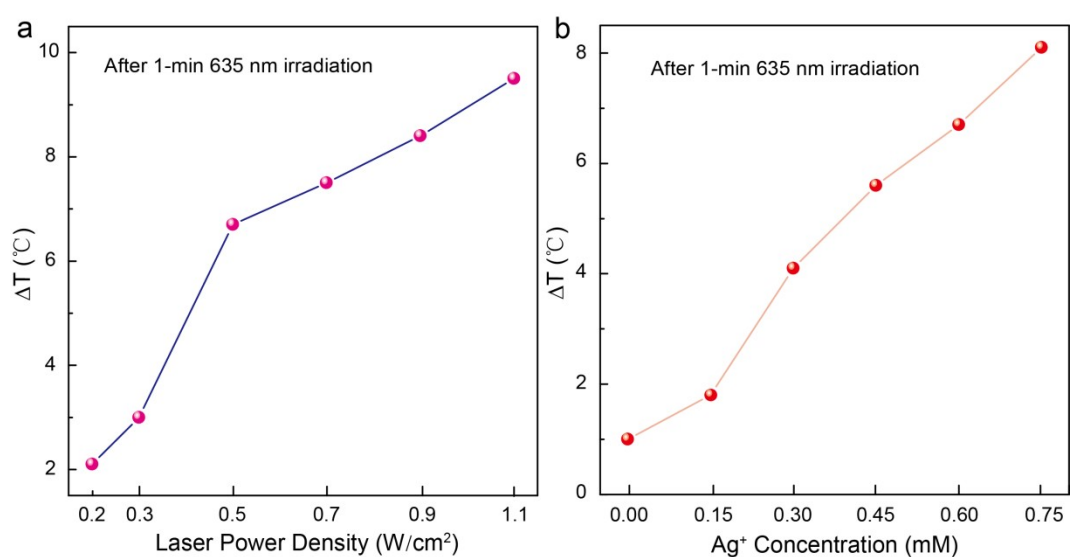

Figure S2 (a) Temperature change curves within 1 minute of ZGGO:Cr,Hf- $\text{Ag}_2\text{S}$  composite nanoplateforms (0.75 mM) under different 635 nm laser irradiation power density (0.2, 0.3, 0.5, 0.7, 0.9, 1.1  $\text{W}/\text{cm}^2$ ); (b) Temperature change curves within 1 minute of ZGGO:Cr,Hf- $\text{Ag}_2\text{S}$  composite nanoplateforms with different concentrations ( $\text{Ag}^+$ : 0, 0.15, 0.30, 0.45, 0.60, 0.75 mM) under 635 nm (0.7  $\text{W}/\text{cm}^2$ ) laser irradiation

## References

1. J. Tauc, *Mater. Res. Bull.*, 1968, **3**, 37-46.
2. M. Cardona and G. Harbeke, *Phys. Rev.*, 1965, **137**, A1467-A1476.
3. S. I. Sadovnikov, A. V. Ishchenko and I. A. Weinstein, *Mater. Sci. Eng., B*, 2023, **296**, 116667.
4. P. George and P. Chowdhury, *Analyst*, 2019, **144**, 3005-3012.
5. S. I. Sadovnikov, *Opt. Mater.*, 2023, **141**, 113928.
6. M. Yarema, S. Pichler, M. Sytnyk, R. Seyrkammer, R. T. Lechner, G. Fritz-Popovski, D. Jarzab, K. Szendrei, R. Resel, O. Korovyanko, M. A. Loi, O. Paris, G. Hesser and W. Heiss, *ACS Nano*, 2011, **5**, 3758-3765.
7. Y. Du, B. Xu, T. Fu, M. Cai, F. Li, Y. Zhang and Q. Wang, *J. Am. Chem. Soc.*, 2010, **132**, 1470-1471.
